# Supplementary material for: A randomised controlled pilot trial evaluating feasibility and acceptability of a computer-based tool to identify and reduce harmful and hazardous drinking among adolescents with alcohol-related presentations in Canadian pediatric emergency departments
Source: PubMed Central journal article supplement — BMJ Open. 2017 Aug 11;7(8):e015423. doi: 10.1136/bmjopen-2016-015423 (PMC5724197; doi:10.1136/bmjopen-2016-015423), 2017-08-11
Supplement: bmjopen-2016-015423supp001.pdf [file bmjopen-2016-015423supp001.pdf]

**Supplementary File.** Items and scaling for questions on (1) receptivity to receiving services, (2) perceived barriers to services, and (3) intervention acceptability.

| <b>Receptivity to receiving services</b>                                                                                                                                                             |                                                                                                                                                                                                           |
|------------------------------------------------------------------------------------------------------------------------------------------------------------------------------------------------------|-----------------------------------------------------------------------------------------------------------------------------------------------------------------------------------------------------------|
| <b>Item</b>                                                                                                                                                                                          | <b>Scale</b>                                                                                                                                                                                              |
| On a scale of 1-5, where 1 is it's definitely a bad idea and 5 it's definitely a good idea, do you think that if someone you knew had an alcohol use problem they should get help or seek treatment? | <ol style="list-style-type: none"> <li>1. Definitely bad idea</li> <li>2. Bad idea</li> <li>3. Neutral</li> <li>4. Good idea</li> <li>5. Definitely good idea</li> </ol>                                  |
| On a scale of 1-5, where 1 is it's definitely cannot help and 5 it definitely can help, do you think that doctors or counselors can help with alcohol use problems in general?                       | <ol style="list-style-type: none"> <li>1. Definitely cannot help</li> <li>2. Cannot help</li> <li>3. Neutral</li> <li>4. Can help</li> <li>5. Definitely can help</li> </ol>                              |
| <b>Perceived barriers to services</b>                                                                                                                                                                |                                                                                                                                                                                                           |
| <b>Item</b>                                                                                                                                                                                          | <b>Scale</b>                                                                                                                                                                                              |
| Do you have any feelings such as dislike, distrust or fear about talking with doctors, counselors or other professionals?                                                                            | <ol style="list-style-type: none"> <li>1. No</li> <li>2. Yes, but didn't affect services sought</li> <li>3. Yes and delayed seeking services</li> <li>4. Yes and stopped from seeking services</li> </ol> |
| Do you have any feelings about what other people would think if you sought help?                                                                                                                     | <ol style="list-style-type: none"> <li>1. No</li> <li>2. Yes, but didn't affect services sought</li> <li>3. Yes and delayed seeking services</li> <li>4. Yes and stopped from seeking services</li> </ol> |
| Do you find there is a lack of information that affected health services sought?                                                                                                                     | <ol style="list-style-type: none"> <li>1. No</li> <li>2. Yes, but didn't affect services sought</li> <li>3. Yes and delayed seeking services</li> <li>4. Yes and stopped from seeking services</li> </ol> |
| Do you have any concerns about the amount of time it takes to get help?                                                                                                                              | <ol style="list-style-type: none"> <li>1. No</li> <li>2. Yes, but didn't affect services sought</li> <li>3. Yes and delayed seeking services</li> <li>4. Yes and stopped from seeking services</li> </ol> |
| Were the health services you sought just not readily available?                                                                                                                                      | <ol style="list-style-type: none"> <li>1. No</li> <li>2. Yes, but didn't affect services sought</li> <li>3. Yes and delayed seeking services</li> <li>4. Yes and stopped from seeking services</li> </ol> |
| Did you feel you just didn't want to talk to anyone about such a sensitive problem?                                                                                                                  | <ol style="list-style-type: none"> <li>1. No</li> <li>2. Yes, but didn't affect services sought</li> <li>3. Yes and delayed seeking services</li> <li>4. Yes and stopped from seeking services</li> </ol> |
| Was there a problem with registration, setting up appointments or contacting professionals?                                                                                                          | <ol style="list-style-type: none"> <li>1. No</li> <li>2. Yes, but didn't affect services sought</li> <li>3. Yes and delayed seeking services</li> </ol>                                                   |

|                                                                                              |                                                                                                                                                                                                           |
|----------------------------------------------------------------------------------------------|-----------------------------------------------------------------------------------------------------------------------------------------------------------------------------------------------------------|
|                                                                                              | 4. Yes and stopped from seeking services                                                                                                                                                                  |
| Was there a problem getting to where treatment was available?                                | <ol style="list-style-type: none"> <li>1. No</li> <li>2. Yes, but didn't affect services sought</li> <li>3. Yes and delayed seeking services</li> <li>4. Yes and stopped from seeking services</li> </ol> |
| <b>Intervention acceptability</b>                                                            |                                                                                                                                                                                                           |
| I liked the way the computer program looked (i.e., graphics, layout).                        | <ol style="list-style-type: none"> <li>1. Strongly disagree</li> <li>2. Disagree</li> <li>3. Unsure</li> <li>4. Agree</li> <li>5. Strongly Agree</li> </ol>                                               |
| This computer program was easy to use.                                                       | <ol style="list-style-type: none"> <li>1. Strongly disagree</li> <li>2. Disagree</li> <li>3. Unsure</li> <li>4. Agree</li> <li>5. Strongly Agree</li> </ol>                                               |
| I was able to finish the computer program quickly.                                           | <ol style="list-style-type: none"> <li>1. Strongly disagree</li> <li>2. Disagree</li> <li>3. Unsure</li> <li>4. Agree</li> <li>5. Strongly Agree</li> </ol>                                               |
| This computer program helped me think about what I do and the impact it can have on my life. | <ol style="list-style-type: none"> <li>1. Strongly disagree</li> <li>2. Disagree</li> <li>3. Unsure</li> <li>4. Agree</li> <li>5. Strongly Agree</li> </ol>                                               |
| I think the feedback that the computer program gave me is believable.                        | <ol style="list-style-type: none"> <li>1. Strongly disagree</li> <li>2. Disagree</li> <li>3. Unsure</li> <li>4. Agree</li> <li>5. Strongly Agree</li> </ol>                                               |
